# Supplementary material for: Amarogentin Inhibits Liver Cancer Cell Angiogenesis after Insufficient Radiofrequency Ablation via Affecting Stemness and the p53‐Dependent VEGFA/Dll4/Notch1 Pathway
Source: Hindawi journal article supplement (doi:10.1155/2020/5391058), 2020-01-01
Supplement: f1 [file 5391058.f1.pdf]

**Amarogentin inhibits liver cancer cell angiogenesis after insufficient radiofrequency ablation via affecting stemness and the p53-dependent VEGFA/Dll4/Notch1 pathway**

Jin Wang<sup>1</sup>, Yinglin Zhang<sup>2</sup>, Yongchuan Zhang<sup>2,\*</sup>, Haitao Gu<sup>3,\*</sup>

**Supplementary materials**

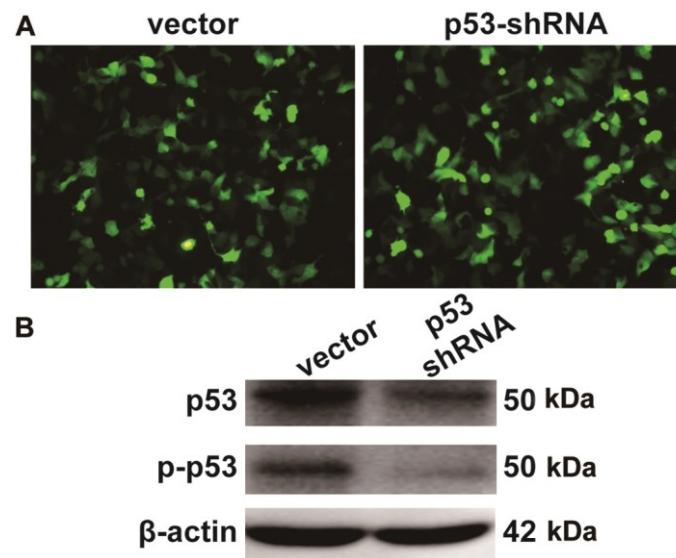

**Supplementary figure 1.** A and B, Transfection efficiency was detected by fluorescence microscopy and western blotting assay (WB) after vector and p53-shRNA transfection for 48 h.

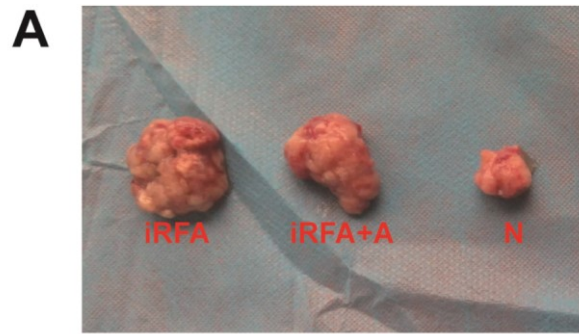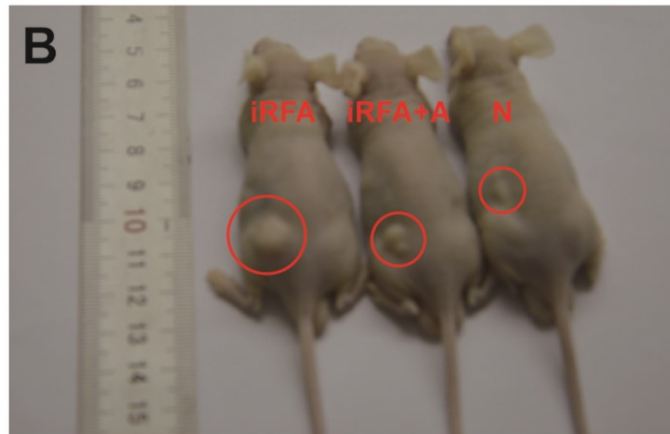

**Supplementary figure 2.** A, Subcutaneous tumors after sacrificing the xenograft mice at 30 days. B, three mice were recorded after xenograft at 3 weeks.

**Supplementary table 1. Clinical characteristics of patients with liver cancer**

| characteristics                       | iRFA         | HEP          | $\chi^2$ | P     |
|---------------------------------------|--------------|--------------|----------|-------|
| Number                                | 9            | 10           | -        | -     |
| Gender (male/ female)                 | 5/4          | 6/4          | -        | -     |
| Number of cirrhosis                   | 3            | 4            | -        | -     |
| Child-Pugh score (A/B)                | 8/1          | 9/1          | -        | -     |
| Age (years)                           | 48.28±6.52   | 45.74±5.18   | 1.625    | 0.097 |
| Diameter of tumor                     | 2.21±0.83    | 2.05±0.54    | 2.033    | 0.085 |
| HBV DNA (log <sub>10</sub> copies/ml) | 2.73±0.19    | 4.15±0.46    | 2.569    | 0.291 |
| IGGR-15 (%)                           | 10.63±7.84   | 12.44±8.61   | 0.715    | 0.362 |
| AFP (ng/ml)                           | 276.39±54.57 | 312.60±37.19 | 1.312    | 0.513 |
| ALT (IU/L)                            | 32.64±11.83  | 40.35±13.67  | 2.164    | 0.196 |
| Albumin (g/L)                         | 38.73±6.16   | 40.37±8.90   | 0.673    | 0.512 |
| TBIL (umol/L)                         | 15.14±4.82   | 17.48±6.43   | 2.316    | 0.347 |

**Supplementary table 2. Antibodies and dilution ratio**

| Antibodies                                                | Application                  |
|-----------------------------------------------------------|------------------------------|
| Rabbit anti-VEGFA antibody (ab52917, Abcam, USA)          | 1:8000 for WB; 1:100 for IHC |
| Rabbit anti-CD133 antibody (ab216323, Abcam, USA)         | 1:1000 for WB; 1:500 for IHC |
| Rabbit anti-CD31 antibody (ab134168, Abcam, USA)          | 1:500 for IHC                |
| PE anti-CD133 Antibody (372804, Biolegend, USA)           | 1:20 for FCM                 |
| Rabbit anti-p-p53 antibody (ab76242, Abcam, USA)          | 1:1000 for WB; 1:100 for IHC |
| Rabbit anti-p53 antibody (ab32389, Abcam, USA)            | 1:1000 for WB                |
| Rabbit anti-Dll4 antibody (ab176876, Abcam, USA)          | 1:500 for WB; 1:100 for IHC  |
| Rabbit anti-p-AKT antibody (ab52627, Abcam, USA)          | 1:1000 for WB; 1:100 for IHC |
| Rabbit anti-β-actin antibody (BM0627, Boster, China)      | 1:200 for WB                 |
| Goat anti-rabbit IgG HRP antibody (BA1055, Boster, China) | 1:2000 for WB                |

**Supplementary table 3. Primers for targeted genes**

| Targeted genes | Primers                               | Length (bp) |
|----------------|---------------------------------------|-------------|
| CD133          | Forward: 5'-AGTCGGAAACTGGCAGATAGC-3'  | 99          |
|                | Reverse: 5'-GGTAGTGTTGTACTGGGCCAAT-3' |             |
| VEGFA          | Forward: 5'-AGGGCAGAATCATCACGAAGT-3'  | 75          |
|                | Reverse: 5'-AGGGTCTCGATTGGATGGCA-3'   |             |
| Dll4           | Forward: 5'-GTCTCCACGCCGGTATTGG-3'    | 98          |
|                | Reverse: 5'-CAGGTGAAATTGAAGGGCAGT-3'  |             |
| Notch1         | Forward: 5'-GAGGCGTGGCAGACTATGC-3'    | 140         |
|                | Reverse: 5'-CTTGTA CTCCGTCAGCGTGA-3'  |             |
| GAPDH          | Forward: 5'-TGTGGGCATCAATGGATTGG-3'   | 116         |
|                | Reverse: 5'-ACACCATGTATTCCGGGTCAAT-3' |             |
